# Supplementary material
Source: publisher figshare collection journal article supplement (https://frontiersin.figshare.com/ndownloader/files/31656569)
Supplement: Supplementary file 1 [file 31656569]

**Supplementary Material**

**
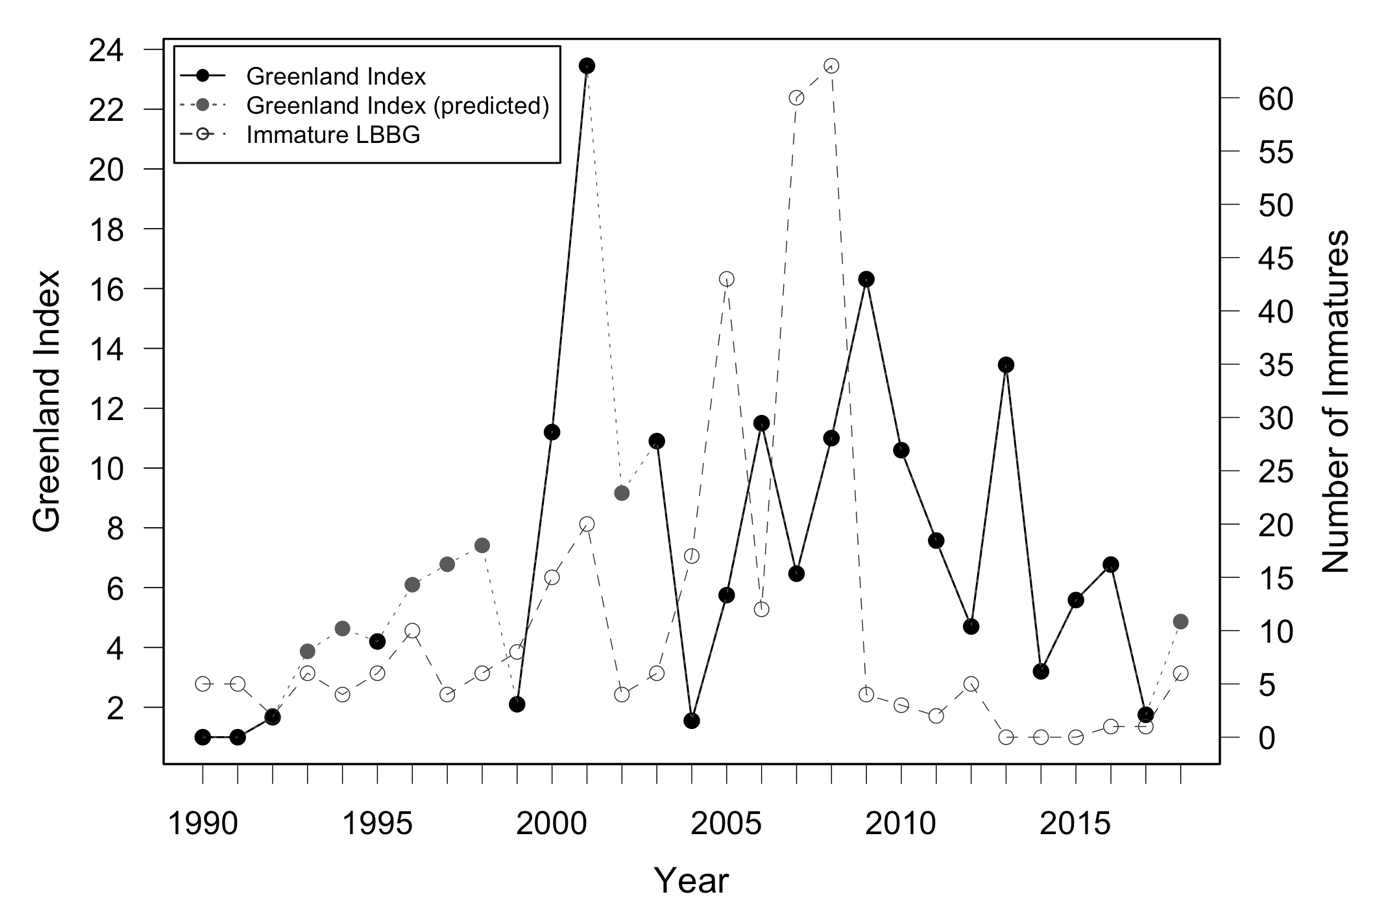
**

**Supplementary Figure 1.** Peaks of immature LBBG (1st through 3rd calendar year birds) coincide with peaks of Greenland breeders. Data on LBBG were taken from *Bird Observer*, which lists records of birds found each year in Massachusetts. The index used for Greenland in this figure is an index of abundance for all Greenland colonies that has been corrected for survey effort by multiplying the average count data in one year by the total number of colonies surveyed in Greenland.


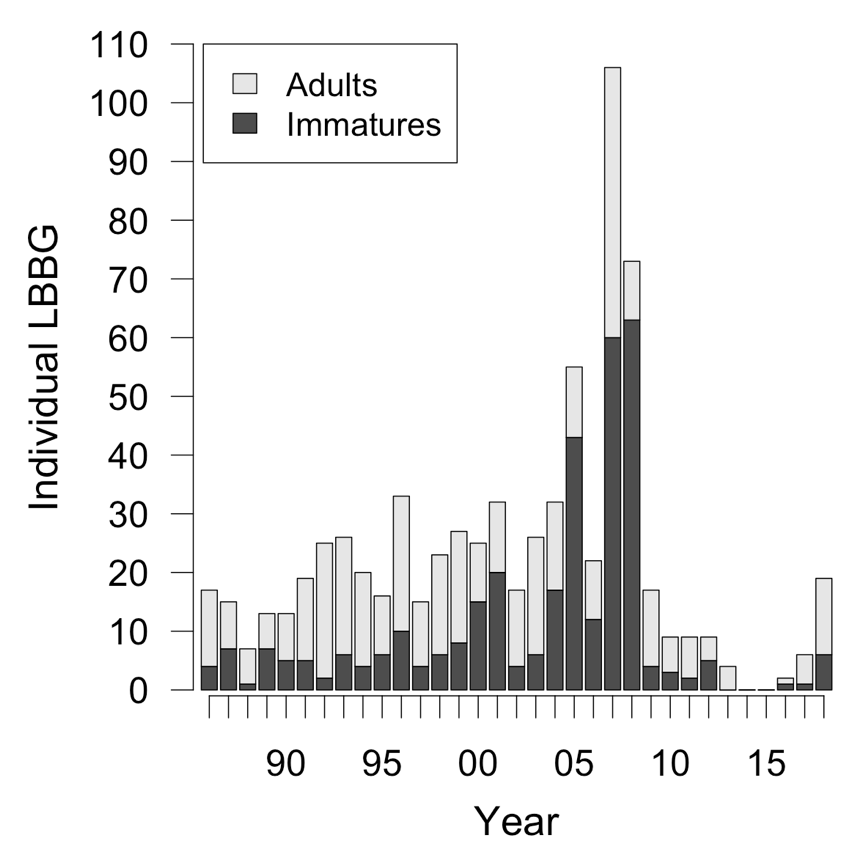

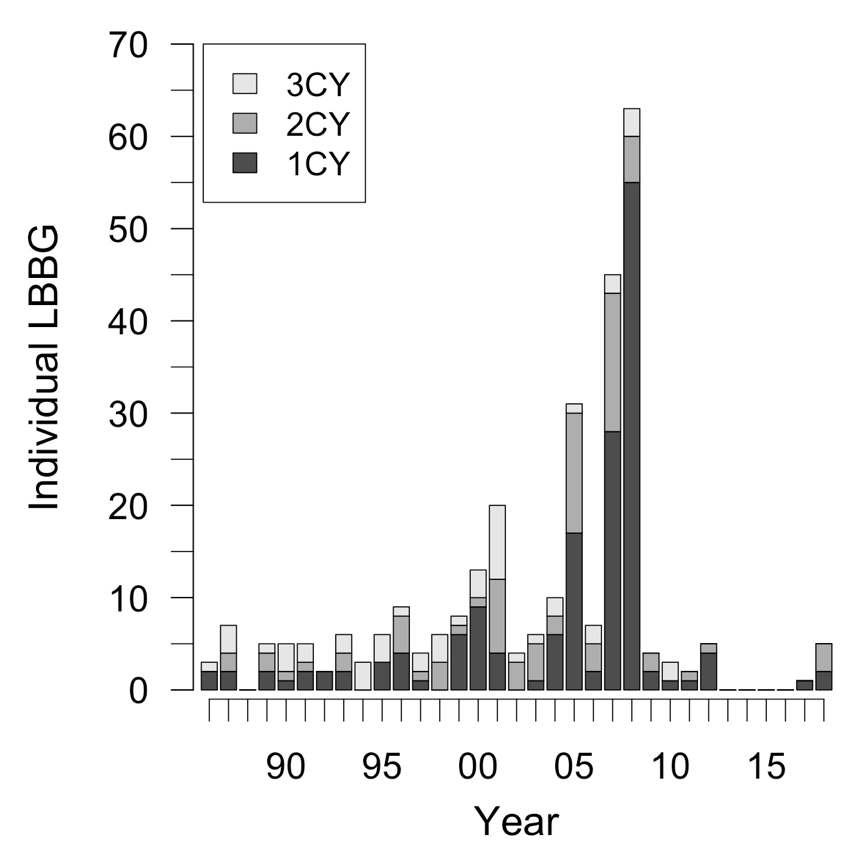


**A**

**B**

**Supplementary Figure 2. (A)** Number of adult (4th winter) and immature (1st winter to 3rd summer) and **(B)** 1st through 3rd calendar year LBBG reported in Massachusetts each year between the years 1986 – 2018. Data were taken from the journal *Bird Observer*. Gulls classified to age represent 9% of the total *Bird Observer* dataset from 1986 – 2018.


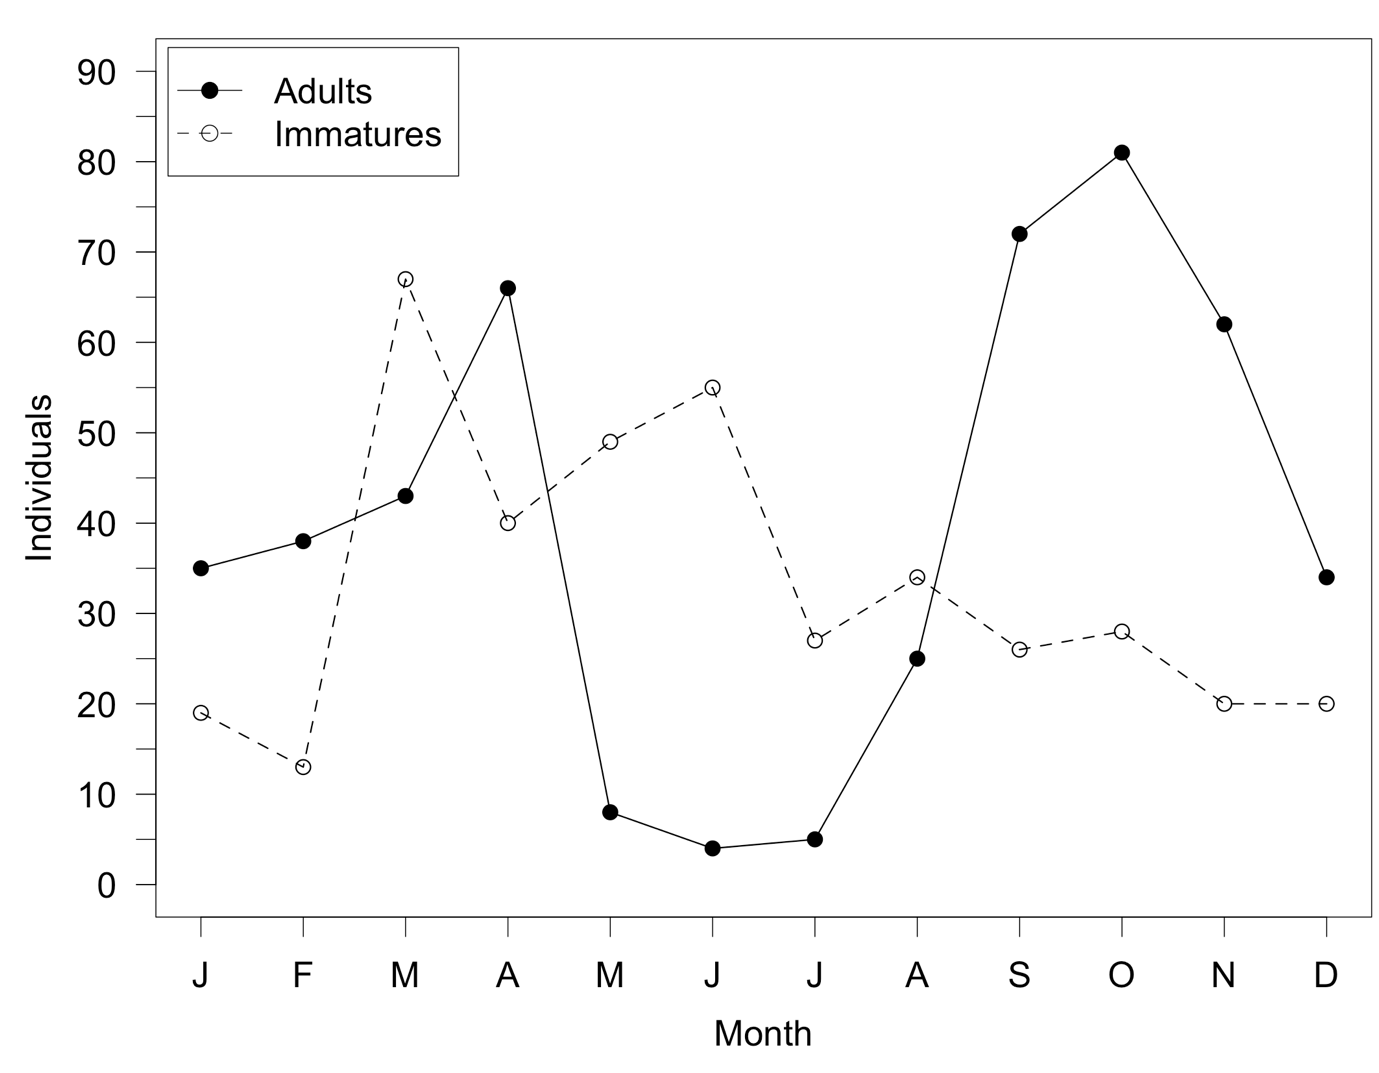


**Supplementary Figure 3.** Number of adult (4th winter or older) and immature (1st winter to 3rd summer) LBBG reported in Massachusetts each month between the years 1971 – 2018. Data were taken from *Bird Observer*.Adults are more commonly seen outside of the breeding season, from September to April, and immatures are more commonly seen from March to June. Gulls classified to age represent 11% of the total *Bird Observer* dataset.

**Supplementary Table 1.** Values of annual vagrant occurrence of LBBG from Christmas Bird Counts (CBC) and *Bird Observer*, and annual breeding population size of LBBG for the UK, Iceland, and Greenland. Years without survey data are years in which surveys were not conducted.

| Year | Bird Observer | CBC | UK Pairs | Iceland Pairs | Greenland Pairs |
| --- | --- | --- | --- | --- | --- |
| 1986 | 21 | 85 | 100687 |  |  |
| 1987 | 17 | 88 | 101506 |  |  |
| 1988 | 16 | 91 | 135019 |  |  |
| 1989 | 23 | 66 | 108679 |  |  |
| 1990 | 21 | 85 | 119540 | 23872 | 1 |
| 1991 | 28 | 113 | 131973 | 20293 | 1 |
| 1992 | 36 | 142 | 116352 | 21987 |  |
| 1993 | 40 | 137 | 154642 |  |  |
| 1994 | 23 | 148 | 176335 |  |  |
| 1995 | 26 | 158 | 168403 |  | 4.2 |
| 1996 | 43 | 218 | 183223 |  |  |
| 1997 | 34 | 240 | 195988 |  |  |
| 1998 | 45 | 420 | 181343 |  |  |
| 1999 | 48 | 447 | 170706 |  | 2.1 |
| 2000 | 339 | 505 | 169317 | 31467 | 11.2 |
| 2001 | 143 | 754 | 107788 |  | 17.5 |
| 2002 | 171 | 739 | 136569 |  |  |
| 2003 | 141 | 647 | 101944 |  | 21 |
| 2004 | 291 | 945 | 104972 | 40204 |  |
| 2005 | 343 | 1080 | 101963 | 31138 | 10.5 |
| 2006 | 188 | 1375 | 99292 | 7395 | 7 |
| 2007 | 376 | 1185 | 93025 |  |  |
| 2008 | 514 | 1891 | 84991 |  | 21 |
| 2009 | 634 | 1372 | 85132 |  | 11.2 |
| 2010 | 684 | 1829 | 83097 |  |  |
| 2011 | 444 | 2136 | 75020 |  | 17.5 |
| 2012 | 288 | 1618 | 74211 |  |  |
| 2013 | 733 | 2287 | 60124 |  |  |
| 2014 | 500 | 2726 | 68789 |  |  |
| 2015 | 688 | 2133 | 61941 |  |  |
| 2016 | 357 | 3078 | 57109 |  |  |
| 2017 | 430 | 2557 | 40041 |  |  |
| 2018 | 406 | 3021 | 46856 |  |  |

**Supplementary Table 2.** Values of Christmas Bird Count (CBC) vagrant trend estimates for LBBG and indices of annual breeding population size and growth rates for LBBG breeding populations in the UK, Iceland, and Greenland. CBC trend estimates are calculated from CBC surveys as estimates of median abundance, using Bayesian hierarchical methods (Soykan et al. 2016, Meehan et al. 2020). Breeding pairs indices were calculated as the percent change in total breeding pairs in that year relative to the base-year (first year of monitoring), which was set to 100%. Percentages were divided by 100 to create an index. Years without survey data are years in which surveys were not conducted.

| Year | CBC estimate | UK index | UK  growth rate | Iceland index | Iceland growth rate | Greenland index | Greenland growth rate |
| --- | --- | --- | --- | --- | --- | --- | --- |
| 1986 | 0.42 | 1.00 | 0.01 |  |  |  |  |
| 1987 | 0.49 | 1.01 | 0.29 |  |  |  |  |
| 1988 | 0.53 | 1.34 | -0.22 |  |  |  |  |
| 1989 | 0.57 | 1.08 | 0.10 |  |  |  |  |
| 1990 | 0.59 | 1.19 | 0.10 | 1.00 | -0.16 | 1.00 | 0.00 |
| 1991 | 0.67 | 1.31 | -0.13 | 0.85 | 0.08 | 1.00 | 1.44 |
| 1992 | 0.75 | 1.16 | 0.28 | 0.92 | 0.36 |  |  |
| 1993 | 0.81 | 1.54 | 0.13 |  |  |  |  |
| 1994 | 0.91 | 1.75 | -0.05 |  |  |  |  |
| 1995 | 0.96 | 1.67 | 0.08 |  |  | 4.20 | -0.69 |
| 1996 | 1.08 | 1.82 | 0.07 |  |  |  |  |
| 1997 | 1.19 | 1.95 | -0.08 |  |  |  |  |
| 1998 | 1.29 | 1.80 | -0.06 |  |  |  |  |
| 1999 | 1.44 | 1.70 | -0.01 |  |  | 2.10 | 1.67 |
| 2000 | 1.60 | 1.68 | -0.45 | 1.32 | 0.25 | 11.20 | 0.45 |
| 2001 | 1.78 | 1.07 | 0.24 |  |  | 17.50 | 0.18 |
| 2002 | 2.08 | 1.36 | -0.29 |  |  |  |  |
| 2003 | 2.36 | 1.01 | 0.03 |  |  | 21.00 | -0.69 |
| 2004 | 2.51 | 1.04 | -0.03 | 1.68 | -0.26 |  |  |
| 2005 | 2.82 | 1.01 | -0.03 | 1.30 | -1.44 | 10.50 | -0.41 |
| 2006 | 3.30 | 0.99 | -0.07 | 0.31 |  | 7.00 | 1.10 |
| 2007 | 3.54 | 0.92 | -0.09 |  |  |  |  |
| 2008 | 3.94 | 0.84 | 0.00 |  |  | 21.00 | -0.63 |
| 2009 | 4.68 | 0.85 | -0.02 |  |  | 11.20 | 0.45 |
| 2010 | 4.88 | 0.83 | -0.10 |  |  |  |  |
| 2011 | 5.53 | 0.75 | -0.01 |  |  | 17.50 |  |
| 2012 | 6.62 | 0.74 | -0.21 |  |  |  |  |
| 2013 | 6.99 | 0.60 | 0.14 |  |  |  |  |
| 2014 | 8.08 | 0.68 | -0.11 |  |  |  |  |
| 2015 | 9.00 | 0.62 | -0.08 |  |  |  |  |
| 2016 | 10.08 | 0.57 | -0.36 |  |  |  |  |
| 2017 | 10.90 | 0.40 | 0.16 |  |  |  |  |
| 2018 | 12.61 | 0.47 |  |  |  |  |  |
